# Supplementary material for: Bioinformatic Analysis and In Vitro and In Vivo Experiments Reveal That Fibrillarin Participates in the Promotion of Lung Metastasis in Hepatocellular Carcinoma
Source: MDPI journal article supplement (doi:10.3390/bioengineering9080396), 2022-08-17
Supplement: s1 [file bioengineering-1806841-supplementary.pdf › bioengineering-1806841-supplementary.pdf]

**Table S1.** The hub genes in Turquoise module and Light cyan module and 67 hub genes related to lung metastasis coming from unit of Turquoise module and Light cyan module.

| Turquoise module hub genes | Light cyan module hub genes | 67 hub genes |
|----------------------------|-----------------------------|--------------|
| AP2S1                      | ARF5                        | ARF5         |
| ARPC4                      | ATP5MF                      | ATP5MF       |
| ATP5MC2                    | ATP6V1F                     | FASTK        |
| ATP6V1F                    | FASTK                       | PDAP1        |
| BCL7C                      | PDAP1                       | POLR2J       |
| BRK1                       | POLR2J                      | SSBP1        |
| CCDC12                     | PTGES2                      | AP2S1        |
| CD2BP2                     | SSBP1                       | ARPC4        |
| CIB1                       |                             | ATP5MC2      |
| COMMD4                     |                             | ATP6V1F      |
| CSNK2B                     |                             | BCL7C        |
| DYNLRB1                    |                             | BRK1         |
| EXOSC5                     |                             | CCDC12       |
| FBL                        |                             | CD2BP2       |
| FKBP1A                     |                             | CIB1         |
| HCFC1R1                    |                             | COMMD4       |
| HRAS                       |                             | CSNK2B       |
| IMP4                       |                             | DYNLRB1      |
| MRPL14                     |                             | EXOSC5       |
| MRPL17                     |                             | FBL          |
| MRPS26                     |                             | FKBP1A       |
| MZT2A                      |                             | HCFC1R1      |
| MZT2B                      |                             | HRAS         |
| NDUFB11                    |                             | IMP4         |
| NEDD8                      |                             | MRPL14       |
| NME1                       |                             | MRPL17       |
| NOP10                      |                             | MRPS26       |
| NOSIP                      |                             | MZT2A        |
| NSUN5                      |                             | MZT2B        |
| NUTF2                      |                             | NDUFB11      |
| PFDN5                      |                             | NEDD8        |
| PLPP3                      |                             | NME1         |
| PMF1                       |                             | NOP10        |
| POLR2H                     |                             | NOSIP        |
| POLR2L                     |                             | NSUN5        |
| PSENEN                     |                             | NUTF2        |
| PTGES2                     |                             | PFDN5        |
| PTRH2                      |                             | PLPP3        |
| RALY                       |                             | PMF1         |
| RPL14                      |                             | POLR2H       |
| RPL18                      |                             | POLR2L       |
| RPL24                      |                             | PSENEN       |
| RPL27A                     |                             | PTGES2       |
| RPL32                      |                             | PTRH2        |
| RPL35A                     |                             | RALY         |
| RPL37                      |                             | RPL14        |
| RPL38                      |                             | RPL18        |
| RPLP1                      |                             | RPL24        |

|         |         |
|---------|---------|
| RPLP2   | RPL27A  |
| RPS11   | RPL32   |
| RPS15   | RPL35A  |
| RPS16   | RPL37   |
| RUVBL2  | RPL38   |
| SERF2   | RPLP1   |
| SNRPA   | RPLP2   |
| SNU13   | RPS11   |
| SSNA1   | RPS15   |
| TAF10   | RPS16   |
| TIMM17B | RUVBL2  |
| TMEM101 | SERF2   |
| TRIR    | SNRPA   |
|         | SNU13   |
|         | SSNA1   |
|         | TAF10   |
|         | TIMM17B |
|         | TMEM101 |
|         | TRIR    |

**Table S2.** The expression of 67 genes between normal liver tissues and hepatocellular carcinoma tissues.

| Genes   | Normal Number | Tumor Number | Normal Mean | Tumor Mean  | P        |
|---------|---------------|--------------|-------------|-------------|----------|
| AP2S1   | 47            | 370          | 4.236174053 | 4.743848669 | 1.63E-16 |
| ARF5    | 47            | 370          | 4.327995933 | 4.883097398 | 2.92E-18 |
| ARPC4   | 47            | 370          | 3.512863813 | 4.078881997 | 1.23E-17 |
| ATP5MC2 | 47            | 370          | 4.262816387 | 4.930182324 | 1.60E-22 |
| ATP5MF  | 47            | 370          | 3.979963092 | 4.843541589 | 5.63E-26 |
| ATP6V1F | 47            | 370          | 4.293143721 | 5.20576096  | 2.62E-24 |
| BCL7C   | 47            | 370          | 2.118654266 | 2.81385153  | 5.00E-19 |
| BRK1    | 47            | 370          | 4.791267292 | 5.283072575 | 6.96E-18 |
| CCDC12  | 47            | 370          | 2.349026338 | 2.886978    | 1.57E-17 |
| CD2BP2  | 47            | 370          | 2.673408624 | 3.475962989 | 9.08E-22 |
| CIB1    | 47            | 370          | 4.902221447 | 5.286295675 | 6.40E-11 |
| COMMD4  | 47            | 370          | 2.459161885 | 3.378739607 | 4.40E-26 |
| CSNK2B  | 47            | 370          | 3.228806047 | 4.018508935 | 2.23E-22 |
| DYNLRB1 | 47            | 370          | 3.557521366 | 4.439422499 | 2.68E-25 |
| EXOSC5  | 47            | 370          | 2.831487938 | 3.685862191 | 8.82E-23 |
| FASTK   | 47            | 370          | 3.177448077 | 4.080366239 | 2.47E-25 |
| FBL     | 47            | 370          | 3.766325498 | 4.686045005 | 5.37E-22 |
| FKBP1A  | 47            | 370          | 3.993354956 | 4.779695157 | 1.75E-22 |
| HCFC1R1 | 47            | 370          | 3.09895519  | 3.848124907 | 1.22E-20 |
| HRAS    | 47            | 370          | 2.462832492 | 3.435088809 | 6.42E-25 |
| IMP4    | 47            | 370          | 3.162838782 | 3.641644946 | 7.75E-19 |
| MRPL14  | 47            | 370          | 4.55426441  | 5.202250606 | 2.49E-18 |
| MRPL17  | 47            | 370          | 2.907411014 | 3.614999108 | 5.51E-22 |
| MRPS26  | 47            | 370          | 4.232530675 | 4.773164023 | 1.02E-16 |
| MZT2A   | 47            | 370          | 2.303094184 | 2.946016908 | 4.84E-14 |
| MZT2B   | 47            | 370          | 3.88218848  | 4.412230407 | 1.94E-12 |
| NDUFB11 | 47            | 370          | 4.780598304 | 5.245927222 | 1.47E-13 |
| NEDD8   | 47            | 370          | 2.975431022 | 3.658874492 | 6.68E-25 |
| NME1    | 47            | 370          | 2.566431934 | 3.668551938 | 6.41E-24 |

|         |    |     |             |             |          |
|---------|----|-----|-------------|-------------|----------|
| NOP10   | 47 | 370 | 4.974046135 | 5.556391615 | 4.43E-20 |
| NOSIP   | 47 | 370 | 2.597752906 | 3.241833468 | 1.81E-19 |
| NSUN5   | 47 | 370 | 2.008022182 | 2.987134009 | 4.53E-25 |
| NUTF2   | 47 | 370 | 2.95722181  | 3.686968526 | 1.14E-23 |
| PDAP1   | 47 | 370 | 3.629840729 | 4.352080924 | 1.21E-25 |
| PFDN5   | 47 | 370 | 4.32326544  | 4.858788929 | 1.96E-17 |
| PLPP3   | 47 | 370 | 4.401122088 | 3.636643709 | 1.03E-13 |
| PMF1    | 47 | 370 | 2.754207444 | 3.616879903 | 5.24E-22 |
| POLR2H  | 47 | 370 | 2.701028445 | 3.428003316 | 2.34E-22 |
| POLR2J  | 47 | 370 | 3.656717386 | 4.335845913 | 2.30E-21 |
| POLR2L  | 47 | 370 | 4.683328546 | 5.390286645 | 1.64E-20 |
| PSENNEN | 47 | 370 | 3.27931317  | 3.883106072 | 1.08E-18 |
| PTGES2  | 47 | 370 | 2.904104984 | 3.682680475 | 3.55E-22 |
| PTRH2   | 47 | 370 | 1.960294131 | 2.66144024  | 1.69E-21 |
| RALY    | 47 | 370 | 2.682623331 | 3.588081996 | 1.65E-25 |
| RPL14   | 47 | 370 | 4.087396049 | 4.802851689 | 3.03E-19 |
| RPL18   | 47 | 370 | 4.98737278  | 5.66695777  | 7.31E-17 |
| RPL24   | 47 | 370 | 5.31528629  | 5.888534047 | 4.96E-15 |
| RPL27A  | 47 | 370 | 4.574013722 | 5.206954748 | 5.54E-16 |
| RPL32   | 47 | 370 | 5.301494139 | 5.946566872 | 8.16E-15 |
| RPL35A  | 47 | 370 | 4.76989948  | 5.507470459 | 1.75E-19 |
| RPL37   | 47 | 370 | 4.381715346 | 5.144606041 | 4.43E-20 |
| RPL38   | 47 | 370 | 4.411329953 | 5.312217286 | 3.69E-22 |
| RPLP1   | 47 | 370 | 5.774536234 | 6.615128266 | 6.65E-22 |
| RPLP2   | 47 | 370 | 5.647896973 | 6.458490313 | 1.81E-19 |
| RPS11   | 47 | 370 | 6.536125455 | 7.208685787 | 2.70E-18 |
| RPS15   | 47 | 370 | 4.779601931 | 5.460213091 | 5.95E-17 |
| RPS16   | 47 | 370 | 5.543713865 | 6.321576168 | 4.17E-20 |
| RUVBL2  | 47 | 370 | 3.191600964 | 3.966654395 | 4.32E-24 |
| SERF2   | 47 | 370 | 4.480006043 | 5.105189806 | 3.79E-20 |
| SNRPA   | 47 | 370 | 2.889018825 | 3.823946285 | 4.65E-26 |
| SNU13   | 47 | 370 | 3.670046745 | 4.348472223 | 2.17E-22 |
| SSBP1   | 47 | 370 | 2.666161325 | 3.30996936  | 8.43E-24 |
| SSNA1   | 47 | 370 | 3.749301352 | 4.537302589 | 5.11E-22 |
| TAF10   | 47 | 370 | 2.427629707 | 3.233120617 | 3.26E-26 |
| TIMM17B | 47 | 370 | 2.946945636 | 3.712441939 | 9.73E-24 |
| TMEM101 | 47 | 370 | 2.43906996  | 3.408766207 | 6.86E-25 |
| TRIR    | 47 | 370 | 4.960609885 | 5.204161076 | 7.26E-06 |

normal: normal liver tissues. tumor: hepatocellular carcinoma tissues. Statistical analysis: Wilcoxon rank sum test. Mean: log (TPM+1).

**Table S3.** The expression of 67 genes between hepatocellular carcinoma tissues without metastasis and hepatocellular carcinoma tissues with lung metastasis.

| Genes   | Non Number | Met Number | Non Mean    | Met Mean    | P        |
|---------|------------|------------|-------------|-------------|----------|
| ARF5    | 13         | 18         | 4.570005153 | 5.042063047 | 0.000353 |
| ARPC4   | 13         | 18         | 3.867000476 | 4.187036753 | 0.0138   |
| ATP5MC2 | 13         | 18         | 4.720339159 | 5.123867245 | 0.00365  |
| ATP5MF  | 13         | 18         | 4.611469347 | 4.995937259 | 0.0247   |
| ATP6V1F | 13         | 18         | 4.868319527 | 5.414773443 | 0.00233  |
| AP2S1   | 13         | 18         | 4.541733219 | 4.893841487 | 0.0564   |
| BCL7C   | 13         | 18         | 2.507078455 | 3.072101564 | 0.00315  |
| BRK1    | 13         | 18         | 5.105341375 | 5.371575494 | 0.0175   |
| CCDC12  | 13         | 18         | 2.643539156 | 3.020931865 | 0.0221   |

|         |    |    |             |             |          |
|---------|----|----|-------------|-------------|----------|
| CD2BP2  | 13 | 18 | 3.229942997 | 3.60019467  | 0.0197   |
| CIB1    | 13 | 18 | 5.014628908 | 5.586124327 | 6.66E-05 |
| COMMD4  | 13 | 18 | 3.185341715 | 3.597329975 | 0.0156   |
| CSNK2B  | 13 | 18 | 3.784803156 | 4.327940775 | 0.0156   |
| DYNLRB1 | 13 | 18 | 4.200194269 | 4.652276939 | 0.0247   |
| EXOSC5  | 13 | 18 | 3.367956056 | 3.895556975 | 0.0156   |
| FASTK   | 13 | 18 | 3.748866306 | 4.285815525 | 6.66E-05 |
| FBL     | 13 | 18 | 4.318137339 | 4.830185251 | 0.0138   |
| FKBP1A  | 13 | 18 | 4.550502823 | 4.848077468 | 0.0512   |
| HCFC1R1 | 13 | 18 | 3.63991686  | 4.119581873 | 0.0122   |
| HRAS    | 13 | 18 | 3.156390634 | 3.61431002  | 0.0512   |
| IMP4    | 13 | 18 | 3.45862231  | 3.781152885 | 0.00951  |
| MRPL14  | 13 | 18 | 5.024049492 | 5.541494188 | 0.0197   |
| MRPL17  | 13 | 18 | 3.325408211 | 3.912309672 | 0.00365  |
| MRPS26  | 13 | 18 | 4.509144071 | 4.850307112 | 0.0197   |
| MZT2A   | 13 | 18 | 2.662547912 | 3.188033805 | 0.0122   |
| MZT2B   | 13 | 18 | 4.063435369 | 4.654737502 | 0.00123  |
| NDUFB11 | 13 | 18 | 5.023454614 | 5.458779467 | 0.0138   |
| NEDD8   | 13 | 18 | 3.450410073 | 3.762364605 | 0.0122   |
| NME1    | 13 | 18 | 3.332932294 | 3.910559124 | 0.0175   |
| NOP10   | 13 | 18 | 5.385986629 | 5.801504318 | 0.0156   |
| NOSIP   | 13 | 18 | 3.045587338 | 3.405222231 | 0.062    |
| NSUN5   | 13 | 18 | 2.77759885  | 3.170719105 | 0.00233  |
| NUTF2   | 13 | 18 | 3.493825926 | 3.812083437 | 0.0156   |
| PDAP1   | 13 | 18 | 4.148651301 | 4.407911099 | 0.0138   |
| PFDN5   | 13 | 18 | 4.650344099 | 4.980768055 | 0.0156   |
| PLPP3   | 13 | 18 | 3.918602329 | 3.22101653  | 0.0122   |
| PMF1    | 13 | 18 | 3.340291981 | 3.941336975 | 0.0138   |
| POLR2H  | 13 | 18 | 3.25260968  | 3.650255739 | 0.0197   |
| POLR2J  | 13 | 18 | 4.044241308 | 4.478988521 | 0.0122   |
| POLR2L  | 13 | 18 | 5.148515762 | 5.552215515 | 0.00951  |
| PSENEN  | 13 | 18 | 3.593537592 | 4.08091174  | 0.0017   |
| PTGES2  | 13 | 18 | 3.376898098 | 3.818746055 | 0.0138   |
| PTRH2   | 13 | 18 | 2.473991838 | 2.94878903  | 0.0175   |
| RALY    | 13 | 18 | 3.391126471 | 3.754746032 | 0.0307   |
| RPL14   | 13 | 18 | 4.533568365 | 4.96338156  | 0.00835  |
| RPL18   | 13 | 18 | 5.33352164  | 5.866520285 | 0.00271  |
| RPL24   | 13 | 18 | 5.612584833 | 6.03869918  | 0.00365  |
| RPL27A  | 13 | 18 | 4.985306181 | 5.482903655 | 0.00835  |
| RPL32   | 13 | 18 | 5.662555965 | 6.104706371 | 0.00732  |
| RPL35A  | 13 | 18 | 5.2403584   | 5.659651209 | 0.0138   |
| RPL37   | 13 | 18 | 4.833223546 | 5.311903917 | 0.0017   |
| RPL38   | 13 | 18 | 4.990707614 | 5.518120271 | 0.00835  |
| RPLP1   | 13 | 18 | 6.338282882 | 6.858418654 | 0.00315  |
| RPLP2   | 13 | 18 | 6.166598336 | 6.704891944 | 0.00835  |
| RPS11   | 13 | 18 | 6.9565856   | 7.412949111 | 0.0108   |
| RPS15   | 13 | 18 | 5.167375937 | 5.652052976 | 0.00732  |
| RPS16   | 13 | 18 | 6.020542409 | 6.402853846 | 0.0138   |
| RUVBL2  | 13 | 18 | 3.726873226 | 4.096748552 | 0.0197   |
| SERF2   | 13 | 18 | 4.88596157  | 5.38366832  | 0.00365  |
| SNRPA   | 13 | 18 | 3.523485441 | 3.950776983 | 0.0247   |
| SNU13   | 13 | 18 | 4.15547317  | 4.523124207 | 0.0276   |
| SSBP1   | 13 | 18 | 3.108569266 | 3.386831786 | 0.0342   |

|         |    |    |             |             |         |
|---------|----|----|-------------|-------------|---------|
| SSNA1   | 13 | 18 | 4.210373035 | 4.636069975 | 0.0138  |
| TAF10   | 13 | 18 | 3.056271973 | 3.479408001 | 0.00271 |
| TIMM17B | 13 | 18 | 3.476594046 | 3.978728866 | 0.00315 |
| TMEM101 | 13 | 18 | 3.068256891 | 3.539063345 | 0.0221  |
| TRIR    | 13 | 18 | 4.938279043 | 5.345218226 | 0.00199 |

non: hepatocellular carcinoma tissues without metastasis. met: hepatocellular carcinoma tissues with lung metastasis. Statistical analysis: Wilcoxon rank sum test. Mean: log (TPM+1).

**Table S4.** 53 genes correlated to FBL with absolute coefficient > 0.4 in TCGA, GSE14520 and PDC000198.

| gene1 | gene2   | TCGA   |          |          | GSE14520 |          |          | PDC000198 |          |          |
|-------|---------|--------|----------|----------|----------|----------|----------|-----------|----------|----------|
|       |         | cor_r  | P value  | FDR      | cor_r    | pvalue   | FDR      | cor_r     | P value  | FDR      |
| FBL   | ACADL   | -0.565 | 1.52E-36 | 1.40E-35 | -0.521   | 1.30E-18 | 2.30E-16 | -0.426    | 1.13E-08 | 2.41E-07 |
| FBL   | ALDH9A1 | -0.420 | 2.98E-19 | 1.07E-18 | -0.464   | 1.34E-14 | 9.88E-13 | -0.463    | 3.74E-10 | 1.20E-08 |
| FBL   | ALDOB   | -0.481 | 1.48E-25 | 7.57E-25 | -0.433   | 1.02E-12 | 4.90E-11 | -0.554    | 1.17E-14 | 9.35E-13 |
| FBL   | APEX1   | 0.601  | 2.61E-42 | 3.41E-41 | 0.533    | 1.63E-19 | 3.43E-17 | 0.403     | 8.15E-08 | 1.36E-06 |
| FBL   | ATIC    | 0.719  | 1.38E-67 | 7.66E-66 | 0.533    | 1.44E-19 | 3.13E-17 | 0.444     | 2.27E-09 | 5.72E-08 |
| FBL   | BYSL    | 0.621  | 6.60E-46 | 1.07E-44 | 0.423    | 3.81E-12 | 1.56E-10 | 0.563     | 3.44E-15 | 3.05E-13 |
| FBL   | BZW2    | 0.585  | 1.42E-39 | 1.57E-38 | 0.546    | 1.49E-20 | 3.55E-18 | 0.528     | 3.33E-13 | 2.04E-11 |
| FBL   | CPSF6   | 0.502  | 5.40E-28 | 3.16E-27 | 0.479    | 1.48E-15 | 1.44E-13 | 0.500     | 7.69E-12 | 3.50E-10 |
| FBL   | DAO     | -0.465 | 8.52E-24 | 3.93E-23 | -0.500   | 4.72E-17 | 6.23E-15 | -0.453    | 9.81E-10 | 2.76E-08 |
| FBL   | DDX50   | 0.517  | 7.62E-30 | 4.94E-29 | 0.463    | 1.55E-14 | 1.12E-12 | 0.482     | 5.40E-11 | 2.13E-09 |
| FBL   | EIF3D   | 0.744  | 1.38E-74 | 1.12E-72 | 0.609    | 1.68E-26 | 7.46E-24 | 0.449     | 1.43E-09 | 3.83E-08 |
| FBL   | EIF3E   | 0.562  | 5.13E-36 | 4.58E-35 | 0.472    | 4.41E-15 | 3.82E-13 | 0.483     | 5.23E-11 | 2.07E-09 |
| FBL   | EIF3H   | 0.600  | 4.40E-42 | 5.67E-41 | 0.449    | 1.15E-13 | 6.82E-12 | 0.432     | 7.03E-09 | 1.59E-07 |
| FBL   | EIF6    | 0.743  | 2.73E-74 | 2.16E-72 | 0.449    | 1.19E-13 | 6.98E-12 | 0.411     | 4.10E-08 | 7.62E-07 |
| FBL   | ETFDH   | -0.678 | 2.42E-57 | 7.24E-56 | -0.410   | 1.91E-11 | 6.63E-10 | -0.452    | 1.10E-09 | 3.01E-08 |
| FBL   | ETNPPL  | -0.587 | 5.81E-40 | 6.63E-39 | -0.452   | 7.20E-14 | 4.51E-12 | -0.417    | 2.51E-08 | 4.94E-07 |
| FBL   | GPD1    | -0.572 | 1.14E-37 | 1.13E-36 | -0.470   | 5.87E-15 | 4.92E-13 | -0.497    | 1.06E-11 | 4.81E-10 |
| FBL   | GYS2    | -0.633 | 5.54E-48 | 1.02E-46 | -0.501   | 4.20E-17 | 5.61E-15 | -0.417    | 2.52E-08 | 4.96E-07 |
| FBL   | HAGH    | -0.412 | 1.73E-18 | 5.91E-18 | -0.466   | 9.53E-15 | 7.53E-13 | -0.439    | 3.78E-09 | 9.04E-08 |
| FBL   | HAO2    | -0.515 | 1.44E-29 | 9.22E-29 | -0.480   | 1.28E-15 | 1.27E-13 | -0.518    | 1.09E-12 | 5.98E-11 |
| FBL   | HMGA1   | 0.656  | 1.43E-52 | 3.39E-51 | 0.470    | 5.57E-15 | 4.70E-13 | 0.462     | 4.15E-10 | 1.30E-08 |
| FBL   | HNRNPA3 | 0.552  | 1.15E-34 | 9.71E-34 | 0.475    | 2.82E-15 | 2.59E-13 | 0.496     | 1.31E-11 | 5.87E-10 |
| FBL   | HNRNPH3 | 0.420  | 2.76E-19 | 9.95E-19 | 0.407    | 3.00E-11 | 1.01E-09 | 0.409     | 5.02E-08 | 9.00E-07 |
| FBL   | HNRNPM  | 0.597  | 1.43E-41 | 1.79E-40 | 0.576    | 2.83E-23 | 8.99E-21 | 0.477     | 9.57E-11 | 3.56E-09 |
| FBL   | HSD17B6 | -0.522 | 1.41E-30 | 9.53E-30 | -0.446   | 1.81E-13 | 1.04E-11 | -0.412    | 3.69E-08 | 6.96E-07 |
| FBL   | IGF2BP2 | 0.522  | 1.51E-30 | 1.01E-29 | 0.440    | 3.92E-13 | 2.06E-11 | 0.450     | 1.32E-09 | 3.56E-08 |
| FBL   | ILF3    | 0.608  | 1.36E-43 | 1.90E-42 | 0.429    | 1.74E-12 | 7.77E-11 | 0.463     | 3.81E-10 | 1.21E-08 |
| FBL   | IMPDH2  | 0.809  | 8.39E-98 | 1.80E-95 | 0.732    | 1.05E-42 | 2.17E-39 | 0.511     | 2.41E-12 | 1.24E-10 |
| FBL   | IPO4    | 0.734  | 1.27E-71 | 8.79E-70 | 0.456    | 4.45E-14 | 2.93E-12 | 0.442     | 2.79E-09 | 6.87E-08 |
| FBL   | LRRC1   | 0.545  | 1.28E-33 | 1.01E-32 | 0.433    | 1.05E-12 | 5.01E-11 | 0.420     | 2.03E-08 | 4.07E-07 |
| FBL   | NAT10   | 0.594  | 3.90E-41 | 4.75E-40 | 0.426    | 2.54E-12 | 1.08E-10 | 0.575     | 6.96E-16 | 6.77E-14 |
| FBL   | NCL     | 0.567  | 9.00E-37 | 8.36E-36 | 0.521    | 1.31E-18 | 2.30E-16 | 0.708     | 1.90E-26 | 9.00E-24 |
| FBL   | NLE1    | 0.737  | 1.09E-72 | 7.91E-71 | 0.497    | 8.56E-17 | 1.05E-14 | 0.459     | 5.89E-10 | 1.79E-08 |
| FBL   | NPM1    | 0.636  | 1.26E-48 | 2.42E-47 | 0.500    | 5.30E-17 | 6.78E-15 | 0.512     | 1.99E-12 | 1.06E-10 |
| FBL   | NSA2    | 0.562  | 4.85E-36 | 4.34E-35 | 0.501    | 4.10E-17 | 5.53E-15 | 0.476     | 1.07E-10 | 3.89E-09 |
| FBL   | PDCD11  | 0.595  | 2.94E-41 | 3.61E-40 | 0.510    | 9.90E-18 | 1.46E-15 | 0.730     | 8.59E-29 | 8.71E-26 |
| FBL   | PES1    | 0.763  | 1.24E-80 | 1.34E-78 | 0.495    | 1.13E-16 | 1.36E-14 | 0.632     | 8.17E-20 | 1.18E-17 |
| FBL   | PFKFB1  | -0.485 | 5.60E-26 | 2.93E-25 | -0.471   | 5.02E-15 | 4.29E-13 | -0.429    | 8.98E-09 | 2.00E-07 |
| FBL   | POLR1D  | 0.558  | 1.58E-35 | 1.38E-34 | 0.434    | 9.65E-13 | 4.65E-11 | 0.410     | 4.67E-08 | 8.46E-07 |
| FBL   | PRMT1   | 0.752  | 3.47E-77 | 3.15E-75 | 0.500    | 5.14E-17 | 6.71E-15 | 0.404     | 7.57E-08 | 1.29E-06 |
| FBL   | RBM12   | 0.407  | 4.26E-18 | 1.43E-17 | 0.578    | 2.13E-23 | 6.94E-21 | 0.564     | 3.02E-15 | 2.71E-13 |

|     |         |        |          |          |        |          |          |        |          |          |
|-----|---------|--------|----------|----------|--------|----------|----------|--------|----------|----------|
| FBL | RPP30   | 0.715  | 1.75E-66 | 9.03E-65 | 0.444  | 2.34E-13 | 1.29E-11 | 0.414  | 3.29E-08 | 6.27E-07 |
| FBL | RSL1D1  | 0.556  | 3.38E-35 | 2.93E-34 | 0.449  | 1.15E-13 | 6.80E-12 | 0.643  | 1.20E-20 | 1.99E-18 |
| FBL | RUVBL2  | 0.799  | 1.18E-93 | 2.11E-91 | 0.576  | 3.30E-23 | 9.99E-21 | 0.555  | 1.07E-14 | 8.81E-13 |
| FBL | SLC10A1 | -0.570 | 2.29E-37 | 2.22E-36 | -0.502 | 3.65E-17 | 5.03E-15 | -0.427 | 1.10E-08 | 2.37E-07 |
| FBL | SLC46A3 | -0.606 | 3.15E-43 | 4.30E-42 | -0.613 | 7.37E-27 | 3.66E-24 | -0.521 | 7.69E-13 | 4.30E-11 |
| FBL | SSB     | 0.550  | 2.84E-34 | 2.33E-33 | 0.512  | 6.41E-18 | 9.70E-16 | 0.550  | 1.87E-14 | 1.39E-12 |
| FBL | TAT     | -0.602 | 1.95E-42 | 2.57E-41 | -0.453 | 6.46E-14 | 4.17E-12 | -0.418 | 2.42E-08 | 4.79E-07 |
| FBL | TPD52L2 | 0.694  | 3.64E-61 | 1.38E-59 | 0.441  | 3.78E-13 | 1.99E-11 | 0.454  | 9.06E-10 | 2.59E-08 |
| FBL | TRIM28  | 0.805  | 3.29E-96 | 6.58E-94 | 0.597  | 3.22E-25 | 1.29E-22 | 0.443  | 2.61E-09 | 6.46E-08 |
| FBL | TRMT1   | 0.735  | 6.75E-72 | 4.71E-70 | 0.451  | 9.00E-14 | 5.44E-12 | 0.471  | 1.69E-10 | 5.96E-09 |
| FBL | WDR46   | 0.744  | 9.19E-75 | 7.48E-73 | 0.435  | 7.89E-13 | 3.87E-11 | 0.720  | 1.07E-27 | 7.62E-25 |
| FBL | XRCC6   | 0.683  | 1.17E-58 | 3.75E-57 | 0.415  | 1.05E-11 | 3.95E-10 | 0.554  | 1.14E-14 | 9.31E-13 |

---
